# Supplementary material for: A minimal bacterial RNase J-based degradosome is associated with translating ribosomes
Source: PubMed Central journal article supplement — Nucleic Acids Res. 2012 Oct 22;41(1):288–301. doi: 10.1093/nar/gks945 (PMC3592473; doi:10.1093/nar/gks945), 2012-10-22
Supplement: supp_gks945_nar-01965-2012-File010.pdf [file supp_gks945_nar-01965-2012-File010.pdf]

## Supplementary material

### Materials and methods

#### Bacterial growth conditions

*H. pylori* cultures were grown microaerobically at 37°C in BHI medium (Oxoid) supplemented with 4% foetal calf serum (FCS) and an antibiotic–fungicide mix (57). Antibiotics were added when appropriate to the final concentration of 20 µg ml<sup>-1</sup> for kanamycin (Kan) and 5 µg ml<sup>-1</sup> for chloramphenicol (Cm). Isopropylthiogalactoside (IPTG) was added to the cultures to a final concentration of 1 mM when necessary. Transcription arrest was performed by rifampicin treatment at a final concentration of 100 µg/ml. 10 ml aliquots were taken 0, 2, 5, 10, 15 and 20 min after rifampicin addition and added to 1.25 ml of 5% phenol in ethanol for subsequent total RNA preparation as described below. For sucrose gradient centrifugation, cells were typically harvested at the end of the exponential growth phase (OD<sub>600</sub> 0.8-0.9) and stored in pellets at -80°C.

Induction of the recombinant proteins in *E. coli* was performed at 30°C during 4 hours at OD<sub>600</sub> 0.5-0.6 by the addition of 1mM IPTG for BL21-CodonPlus-RIL and of 2% L-arabinose plus 1mM IPTG for BL21-AI strains.

#### Construction of plasmids and strains

Strains are listed in Table S1, plasmids in Table S2 and primers in Table S3. The procedure described in (25) was used to construct two TOPO® -derived plasmids (Invitrogen), pILL2301 and pPH132, that carry the 514 and 541 bp-long 3'-end sequences of *rnj* and *rhpA*, respectively, in fusion with the TAP-tag sequence followed by a non-polar kanamycin resistance cassette (amplified from plasmid pILL851C, (25)) and 504 and 539 bp of the downstream DNA regions. Each of these plasmids was verified by sequencing and introduced into *H. pylori* strain 26695 by natural transformation. Allelic exchange was selected on kanamycin containing plates and constructs were verified by PCR and sequencing. The resulting *H. pylori* strains UPH298 and UPH691 were expressing chromosomal Hp-RNase J and RhpA, respectively, fused to the TAP tag at the C-terminus, as controlled by Western blotting with peroxidase-coupled anti-peroxidase antibodies (SIGMA).

To construct the *H. pylori* B128 strains that allow the controlled expression of the full length Hp-RNase J or truncated ΔN-Hp-RNase J, *rnj* or ΔN-*rnj* were amplified with primers 910/911 and 948/911 respectively and cloned into *NdeI/KpnI* sites of pPH85, a derivative of the *E. coli/H. pylori* shuttle vector pILL2157 (27) from which the *lacZ* sequence was removed. This resulted in plasmids pPH134 and pPH135. They were introduced into *H. pylori*

strain B128 by mobilization, as described in Backert *et al.* (28). To replace the chromosomal copy of *rnj* with a kanamycin cassette (Kan), plasmid pPH138 derived from pCR8/GW/TOPO-TA (Invitrogen) was constructed. It carried 462 bp sequence upstream and 517 bp sequence downstream of *rnj* locus amplified with primer pairs 284/285 and 286/287, respectively, interrupted by non-polar kanamycin cassette (amplified with primers 832/918). The plasmid was verified by sequencing and introduced into the *H. pylori* strains carrying plasmids pPH134 or pPH135 by natural transformation. The resulting strains UPH738 and UPH739 in which *rnj* was replaced by *kan* through allelic exchange were selected on Kan-containing plates and verified by PCR.

Chromosomal deletion of *rhpA* (ORF number HPB128\_21g22 in B128) and replacement with the Kan cassette was done using plasmid pPH104 derived from pCR8/GW/TOPO-TA (Invitrogen). Fragments of 483bp and 548bp corresponding to the upstream and downstream DNA sequences of *rhpA* respectively were amplified with primers 1029/1030 and 1031/1032. They were fused to the Kan cassette and the resulting fragment was cloned into pCR8/GW/TOPO-TA resulting in plasmid pPH104. *rhpA* deletion mutant was obtained with pPH104 as described above resulting in the strain UPH740.

Plasmid pGEX-4T-2 (GE Healthcare) was used for cloning and expression of RhpA tagged with glutathione S-transferase (GST) at the N-terminus. Transformation of the obtained plasmid pPH86 into *E. coli* BL21-AI cells resulted in strain UPH597.

Plasmids pPH42, pPH133, pPH123 and pPH121 derived from vector pET28a+ (Novagen) were constructed to express Hp-RNase J,  $\Delta$ N-Hp-RNase J and RhpA, respectively, each fused at the N-terminus to a hexahistidine sequence. Their transformation to BL21-CodonPlus<sup>®</sup>-RIL strain resulted in strains UPH600, UPH733, UPH688 and UPH672 respectively. Co-expression of His-tagged Hp-RNase J or  $\Delta$ N-Hp-RNase J together with GST-RhpA and of His-Hp-RNase J with GST alone was performed in the BL21-AI background (strains UPH574, UPH598 and UPH 780 respectively).

### **Purification of recombinant *H. pylori* proteins from *E. coli*.**

A 1 ml column was packed with Ni<sup>2+</sup>-nitrilotriacetic (NTA) agarose resin (QIAGEN) and equilibrated with lysis buffer (25 mM Tris-HCl pH 7.8, 500 mM NaCl, 10% glycerol, 0.5% Triton X-100). Cell pellets were resuspended in 10 ml of lysis buffer containing a tablet of Complete<sup>®</sup> Mini EDTA-free Protease Inhibitor Cocktail (Roche). Bacteria were lysed in a French Press pressure cell at 1,400 bar twice, centrifuged for 20 minutes at 10,000 g and the supernatant was applied to the Ni<sup>2+</sup>-NTA column. The column was then washed consecutively with 10 ml of the following buffers, wash buffer 1 (25 mM Tris-HCl pH 7.8,

300 mM NaCl, 20 mM imidazole), wash buffer 2 (25 mM Tris-HCl pH 7.8, 1.5 M NaCl, 20 mM imidazole) and wash buffer 3 (25 mM Tris -HCl pH 7.8, 300 mM NaCl, 50 mM imidazole). The His-tagged proteins were eluted in eight fractions of ~1.4 ml each with elution buffer (25 mM Tris -HCl pH 7.8, 300 mM NaCl, 250 mM imidazole). Protein content was monitored with Quick Start Bradford protein reagent (Bio-Rad). Fractions containing recombinant protein were pooled and dialysed overnight in 2 L of 25 mM Tris-HCl pH 7.8, 300 mM NaCl, 10% glycerol and 1 mM DTT. Proteins were concentrated by ultrafiltration when appropriate and stored in aliquots at -80°C.

The Hp-RNase J/RhpA complex was purified from 100 ml of induced cultures of strains UPH574 and UPH598 co-expressing His-Hp-RNase J with GST-RhpA and His- $\Delta$ N-Hp-RNase J with GST-RhpA, respectively. Strain UPH780 expressing His-Hp-RNase J and GST alone was used for a control. Cells were pelleted and resuspended in 7 ml of running buffer (PBS pH 7.4, 100 mM NaCl) containing 10% glycerol, 0.5% Triton X-100 and a tablet of Complete<sup>®</sup>, Mini, EDTA-free Protease Inhibitor Cocktail (Roche). Cells were lysed in the French Press pressure cell at 1,400 bar and centrifuged for 20 min at 10,000g. The supernatant was applied to 1 ml GSTrap<sup>™</sup> FF column (GE Healthcare), previously equilibrated with the running buffer. The column was then washed with 10 ml running buffer and GST-tagged protein was eluted in eight fractions of ~1.4 ml each with 50 mM Tris-HCl pH 7.8, 100 mM NaCl containing 10 mM glutathione. Fractions containing recombinant proteins were concentrated and stored in 10 % glycerol at -80°C.

Strains UPH574 and UPH598 were also used for complex purification on Ni<sup>2+</sup>-NTA column as described above. Salt concentration in the buffers was kept low to maintain complex integrity. Lysis buffer was 25 mM Tris-HCl pH 7.4, 100 mM NaCl, 10 % glycerol, 0.5 % Triton X-100, wash buffer was 25 mM Tris-HCl pH 7.4, 100 mM NaCl and elution buffer was 25 mM Tris-HCl pH 7.4, 100 mM NaCl, 250 mM imidazole.

### **Total RNA preparation**

Cell growth was stopped by the addition of 1.25 ml of 5% phenol in cold ethanol. After centrifugation, cells were resuspended in 800  $\mu$ l of cold buffer 20 mM Tris-HCl pH 8, 2 mM EDTA and lysed by the addition of 40  $\mu$ l of 20 % SDS. Then, 30  $\mu$ l of 3 M sodium acetate pH 5 were added and the cell extract was mixed with 1 ml of acid-saturated phenol (SIGMA) that was pre-heated to 64°C. Lysates were vortexed vigorously for 1 min and centrifuged at 4°C during 15 min. The upper phase was subjected to two more rounds of cold acid-saturated phenol-chloroform (1:1) extraction, the second time in Phase-Lock Gel<sup>™</sup> (5 PRIME) tubes. Finally, RNA was precipitated with isopropanol, washed with 70% ethanol and resuspended

in 40  $\mu\text{l}$  of RNase-DNase free water. RNA concentration was measured with NanoDrop ND-1000 (Labtech) and adjusted to 1  $\mu\text{g}/\mu\text{l}$ .

#### **ATPase activity test**

500  $\mu\text{l}$  reaction buffer contained 10 mM HEPES-NaOH pH 7.5, 75 mM KCl, 2 mM ATP, 2 mM  $\text{MgCl}_2$ , 0.5 mM phosphoenolpyruvate (PEP), 0.25 mM NADH, 100  $\mu\text{g}/\text{ml}$  lactate dehydrogenase and 100  $\mu\text{g}/\text{ml}$  pyruvate kinase. Yeast RNA (Ambion) was added to a final concentration of 100  $\mu\text{g}/\text{ml}$  when indicated. Reactions were incubated for 1 h at 37°C in the thermostatic chamber of a Cary 50 Bio spectrophotometer (Varian). NADH oxidation was monitored at 340 nm and ATP hydrolysis rate was calculated from linear NADH oxidation plots assuming NADH extinction coefficient of  $6300 \text{ M}^{-1} \text{ cm}^{-1}$ .

## Supplemental Tables

**Table S1. Strains used in this study**

| Strain Name | Organism         | Strain          | Chromosomal construct | Replicative plasmid(s) |
|-------------|------------------|-----------------|-----------------------|------------------------|
| UPH531      | <i>E. coli</i>   | One Shot® TOP10 |                       | pPH104                 |
| UPH574      | <i>E. coli</i>   | BL21-AI         |                       | pPH86 + pPH42          |
| UPH598      | <i>E. coli</i>   | BL21-AI         |                       | pPH86 + pPH133         |
| UPH597      | <i>E. coli</i>   | BL21-AI         |                       | pHP86                  |
| UPH600      | <i>E. coli</i>   | B21 Codon+RIL   |                       | pPH42                  |
| UPH672      | <i>E. coli</i>   | B21 Codon+RIL   |                       | pPH121                 |
| UPH733      | <i>E. coli</i>   | B21 Codon+RIL   |                       | pPH133                 |
| UPH737      | <i>E. coli</i>   | One Shot® TOP10 |                       | pPH138                 |
| UPH780      | <i>E. coli</i>   | B21 Codon+RIL   |                       | pGEX4T2+pPH42          |
| UPH298      | <i>H. pylori</i> | 26695           | <i>rnj</i> -TAP       |                        |
| UPH691      | <i>H. pylori</i> | 26695           | <i>rhpA</i> -TAP      |                        |
| UPH738      | <i>H. pylori</i> | B128            | <i>rnj::Kan</i>       | pPH134                 |
| UPH739      | <i>H. pylori</i> | B128            | <i>rnj::Kan</i>       | pPH135                 |
| UPH740      | <i>H. pylori</i> | B128            | <i>rhpA::Kan</i>      |                        |

**Table S2. Plasmids used in this study**

| <b>Plasmid</b> | <b>Vector</b>   | <b>Construct</b>                   |
|----------------|-----------------|------------------------------------|
| pILL2301       | pJRD184         | <i>rnj</i> -TAP                    |
| pPH42          | pET28a+         | His <sub>6</sub> -RNJ              |
| pPH85          | pILL2157        | lacZ replaced with linker          |
| pPH86          | pGEX4T2         | GST-RhpA                           |
| pPH104         | pCR8/GW/TOPO-TA | <i>rhpA::Kan</i>                   |
| pPH121         | pET28a+         | His <sub>6</sub> -RhpA             |
| pPH132         | pCR8/GW/TOPO-TA | <i>rhpA</i> -TAP                   |
| pPH133         | pET28a+         | His <sub>6</sub> - $\Delta$ N-RNJ  |
| pPH134         | pILL2157        | <i>Pi-rnj</i>                      |
| pPH135         | pILL2157        | <i>Pi-<math>\Delta</math>N-rnj</i> |
| pPH138         | pCR8/GW/TOPO-TA | <i>rnj::Kan</i>                    |

**Table S3. DNA oligonucleotides used in this study**

| Name  | Sequence                                                                    | Purpose                                                                                                   |
|-------|-----------------------------------------------------------------------------|-----------------------------------------------------------------------------------------------------------|
| 284   | GCAGGGGCTTATTGGTGATGACGCAA<br>AGG                                           | PCR amplification of <i>rnj</i> upstream fragment for <i>rnj</i> disruption with Kan cassette, forward    |
| 285   | GGCATTAGCCTTTTAAAAGGTAATTTAA<br>GAGC                                        | PCR amplification of <i>rnj</i> upstream fragment for <i>rnj</i> disruption with Kan cassette, reverse    |
| 286   | ATGCCCATCTTTTTGATTGTAACGC                                                   | PCR amplification of <i>rnj</i> downstream fragment for <i>rnj</i> disruption with Kan cassette, forward  |
| 287   | CATCGCCTAACGCTAGAGTTAGGGTGG<br>TAG                                          | PCR amplification of <i>rnj</i> downstream fragment for <i>rnj</i> disruption with Kan cassette, reverse  |
| H323  | <u>AACTGCAGGTTTTTCTTACCCGTGCAT</u><br>GGGAATATAAC                           | PCR amplification of <i>rnj</i> upstream fragment for TAP tag cloning, <i>Pst</i> I site is underlined    |
| H324  | CTCTTTTCCATGGATCCAAAAGAATGG<br>GCATGACAAATGAT                               | PCR amplification of <i>rnj</i> upstream fragment for TAP tag cloning                                     |
| H325  | TAGTACCTGGAGGGAATAATGCCCAT<br>CTTTTTGATTGTAACGCTATTG                        | PCR amplification of <i>rnj</i> downstream fragment for TAP tag cloning                                   |
| H326  | <u>CCATCGATCGCTAGAGTTAGGGTGGTA</u><br>GAAGTCGTTGG                           | PCR amplification of <i>rnj</i> downstream fragment for TAP tag cloning, <i>Cl</i> aI site is underlined  |
| PH001 | <u>AACTGCAGGGCTACAGATGTGGCGAGT</u><br>CGTGGGCTAGA                           | PCR amplification of <i>rhpA</i> upstream fragment for TAP tag cloning, <i>Pst</i> I site is underlined   |
| PH002 | CTCTTTTCCATGGATCCACGGCGTTTG<br>GGTTTTTAGAATA                                | PCR amplification of <i>rhpA</i> upstream fragment for TAP tag cloning                                    |
| PH003 | TAGTACCTGGAGGGAATAATGCCCAT<br>GATTTGAACGAACATTTA                            | PCR amplification of <i>rhpA</i> downstream fragment for TAP tag cloning                                  |
| PH004 | <u>CCATCGATGAGCGCACCATCGCGCA</u><br>CCACAGGGTTG                             | PCR amplification of <i>rhpA</i> downstream fragment for TAP tag cloning, <i>Cl</i> aI site is underlined |
| PH015 | <u>ATCGTCATATGGAGAATTTGTATTTTCA</u><br>GGGTACGGATAACAACCAAAACAATGA<br>AAACC | <i>rnj</i> cloning to pET28a+, <i>Nde</i> I site is underlined                                            |
| PH016 | <u>ATCGTGAATTC</u> TCAAAAAGAATGGGCA<br>TGAC                                 | <i>rnj</i> cloning to pET28a+, <i>Eco</i> RI site is underlined                                           |
| H346  | <u>CTAATACGACTCACTATAGGGAGAATTT</u><br>CCCTATCCCTGCACCGACC                  | PCR amplification for 5S riboprobe, T7 RNA polymerase promoter in underlined                              |
| 5S-Fw | AGAGAAGAGGAACTACCC                                                          | PCR amplification for 5S riboprobe                                                                        |
| 832   | CGGTACCCGGGTGACTAA                                                          | PCR amplification of Kan cassette, forward                                                                |
| 910   | CCACCACATATGATGACGGATAACAAC<br>CAAAACAATG                                   | Forward for <i>rnj</i> cloning to pILL2157, <i>Nde</i> I site is underlined                               |
| 911   | CAACAGGGTACCTCAAAAAGAATGGGC<br>ATGACAAATG                                   | Reverse primer for <i>rnj</i> cloning to pILL2157, <i>Kpn</i> I site is underlined                        |
| 914   | TATGACTAGTGCTCTACCGCCGTAGCA<br>ATG                                          | Linker for <i>lacZ</i> replacement in pILL2157                                                            |
| 915   | GATCCATTGCTACCGCCGTAGAGCACT<br>AGTCA                                        | Linker for <i>lacZ</i> replacement in pILL2157                                                            |
| 918   | ACTCTAGAGGATCCCCGGGT                                                        | PCR amplification of Kan cassette, reverse                                                                |
| 948   | CCACCACATATGA <u>ACTTAAACTCTAAAG</u><br>CGAGCG                              | Forward for $\Delta N$ - <i>rnj</i> cloning to pILL2157, <i>Nde</i> I site is underlined                  |
| 958   | GTTGTCATCACTTATTCTGCAC                                                      | PCR amplification for <i>ureI</i> riboprobe, reverse                                                      |
| 959   | GCTCTAATACGACTCACTATAGGGTAG<br>GTGAAACCAACAATAACCC                          | PCR amplification for <i>ureI</i> riboprobe, T7 RNAP polymerase promoter in underlined                    |
| 1009  | AATCTCCCGGGGAATTGAATCAACCAC<br>CACTCCCT                                     | <i>rhpA</i> cloning to pGEX4T2, <i>Sma</i> I site is underlined                                           |
| 1010  | AGCAATCTCGAGACGGCGTTTGGGTTT<br>TTTAGAATAA                                   | <i>rhpA</i> cloning to pGEX4T2, <i>Xho</i> I site is underlined                                           |
| 1020  | CATCAACATATGA <u>ACTTAAACTCTAAAG</u><br>CGAG                                | $\Delta N$ - <i>rnj</i> cloning to pET28a+, <i>Nde</i> I site is underlined                               |
| 1021  | CACACAGAATTCTCAAAAAGAATGGGC<br>ATGACAAATG                                   | $\Delta N$ - <i>rnj</i> cloning to pET28a+, <i>Eco</i> RI site is underlined                              |
| 1029  | GGTAAGGAGGCTGTAATCATCAC                                                     | PCR amplification of <i>rhpA</i> upstream fragment for <i>rhpA</i> replacement with <i>Kan</i> , forward  |
| 1030  | GTTAGTCACCCGGGTACCTTTATAAAAA<br>GCTAATAAAAGGC                               | PCR amplification of <i>rhpA</i> upstream fragment for <i>rhpA</i> replacement with <i>Kan</i> , reverse  |

|      |                                                      |                                                                                                            |
|------|------------------------------------------------------|------------------------------------------------------------------------------------------------------------|
| 1031 | TACCTGGAGGGAATAAATATTTAAAAAG<br>GAAATTCATGCC         | PCR amplification of <i>rhpA</i> downstream fragment for <i>rhpA</i> replacement with <i>Kan</i> , forward |
| 1032 | GCGCACCACAGGGTTGATG                                  | PCR amplification of <i>rhpA</i> downstream fragment for <i>rhpA</i> replacement with <i>Kan</i> , reverse |
| 1078 | GGGAATTC <u>CCCATATGGAATTGAATCA</u><br>AC            | <i>rhpA</i> cloning in pET28a+, <i>NdeI</i> site is underlined                                             |
| 1079 | TATGCGGGATC <u>CTTAACGGCGTTTGGG</u><br>TTTTTAG       | <i>rhpA</i> cloning in pET28a+, <i>Bam</i> HI site is underlined                                           |
| 1091 | AGCTTTTGAATTTTCACTGCTGTT                             | PCR amplification for seRNA72                                                                              |
| 1093 | ATGACGGATAACAACCAAAACAATG                            | PCR amplification for asRNA66                                                                              |
| 1094 | CTAATACGACTCACTATAGGGAGAAAA<br>GTTATGACGGATAACAACCA  | PCR amplification for seRNA72, T7 RNA polymerase promoter in underlined                                    |
| 1095 | CTAATACGACTCACTATAGGGAGAAGC<br>TTTTGAATTTTCACTGCTGTT | PCR amplification for asRNA66, T7 RNA polymerase promoter in underlined                                    |
| 1108 | FAM-TCACCCGTGCGCCACTAATC                             | FAM-labelled primer for primer extension for 16S rRNA                                                      |
| 1109 | CTGACTAAATAGAGTGAGGG                                 | For PCR sequencing of 16S end                                                                              |
| 1110 | TCACCCGTGCGCCACTAATC                                 | For PCR sequencing of 16S end                                                                              |
| 1114 | FAM-GAGCAGTATTATCAGCGATGAAG                          | FAM-labelled primer for primer extension for 5S rRNA                                                       |
| 1115 | GACTACTACTAATAGAGCGTTTG                              | For PCR sequencing of 5S                                                                                   |
| 1116 | GAGCAGTATTATCAGCGATGAAG                              | For PCR sequencing of 5S                                                                                   |
| 1117 | FAM-CCATTCGGACATCTACGCATC                            | FAM-labelled primer for primer extension for 23S rRNA                                                      |
| 1118 | GCAAGTTCTACAAGCTAAAAGC                               | For PCR sequencing of 23S                                                                                  |
| 1119 | CCATTCGGACATCTACGCATC                                | For PCR sequencing of 23S                                                                                  |



**Table S4. Mass-spectrometry data for proteins co-purified with Hp-RNase J by TAP**

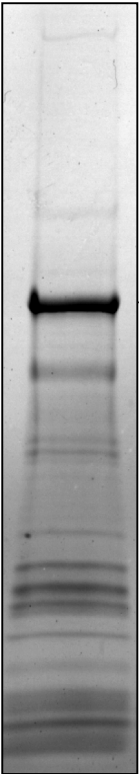

|     | Name                                                                     | Accession number <sup>a</sup> | MW       | Peptide count | Mascot Score <sup>b</sup> | CI% <sup>c</sup> | Total Ion Score | CI%    | Sequence coverage (%) |
|-----|--------------------------------------------------------------------------|-------------------------------|----------|---------------|---------------------------|------------------|-----------------|--------|-----------------------|
| <01 | DNA-dependent RNA polymerase beta-beta prime subunit                     | HP1198                        | 324397,9 | 24            | 142                       | 100              | 126             | 100    | 6                     |
| <02 | ND <sup>d</sup>                                                          | ND                            |          |               |                           |                  |                 |        |                       |
| <03 | RNaseJ                                                                   | HP1430                        | 77509,1  | 18            | 669                       | 100              | 538             | 100    | 40                    |
| <04 | ND <sup>d</sup>                                                          | ND                            |          |               |                           |                  |                 |        |                       |
| <05 | Predicted ATP-dependent RNA helicase                                     | HP0247                        | 55885,4  | 8             | 107                       | 100              | 73              | 100    | 18                    |
| <06 | Predicted translation elongation factor Tu                               | HP1205                        | 43734,4  | 14            | 276                       | 100              | 176             | 100    | 39                    |
| <07 | Predicted translation elongation factor Tu                               | HP1205                        | 43734,4  | 17            | 463                       | 100              | 324             | 100    | 51                    |
| <08 | Predicted translation elongation factor Tu                               | HP1205                        | 43734,4  | 14            | 316                       | 100              | 218             | 100    | 35                    |
| <09 | Predicted S-adenosylmethionine synthetase                                | HP0197                        | 42677,7  | 4             | 66                        | 99,957           | 49              | 99,993 | 15                    |
| <10 | Predicted UDP-3-0-(3-hydroxymyristoyl) glucosamine N-acyltransferase     | HP0196                        | 36737,3  | 6             | 110                       | 100              | 77              | 100    | 15                    |
| <11 | Predicted ribosomal protein S2                                           | HP1554                        | 30839,1  | 13            | 158                       | 100              | 84              | 100    | 30                    |
| <12 | Predicted fructose-bisphosphate aldolase                                 | HP0176                        | 33865,4  | 9             | 120                       | 100              | 69              | 100    | 28                    |
| <13 | Predicted ribosomal protein L2/peptidyl-transferase                      | HP1316                        | 30309,1  | 10            | 212                       | 100              | 152             | 100    | 38                    |
| <14 | Predicted ribosomal protein S3                                           | HP1313                        | 26420,6  | 7             | 161                       | 100              | 133             | 100    | 30                    |
| <15 | Predicted ribosomal protein L4                                           | HP1318                        | 24122,5  | 8             | 255                       | 100              | 206             | 100    | 40                    |
| <16 | Predicted ribosomal protein S4                                           | HP1294                        | 23949,8  | 17            | 314                       | 100              | 186             | 100    | 53                    |
| <17 | Predicted ribosomal protein L4                                           | HP1318                        | 24122,5  | 5             | 135                       | 100              | 109             | 100    | 29                    |
| <18 | Predicted ribosomal protein L3                                           | HP1319                        | 21292,2  | 13            | 321                       | 100              | 226             | 100    | 48                    |
| <19 | Predicted ribosomal protein L6                                           | HP1304                        | 19474,5  | 10            | 319                       | 100              | 232             | 100    | 46                    |
| <20 | Predicted ribosomal protein L5                                           | HP1307                        | 20271,9  | 5             | 101                       | 100              | 84              | 100    | 21                    |
| <21 | Predicted ribosomal protein L10                                          | HP1200                        | 18650,9  | 6             | 80                        | 99,998           | 47              | 99,987 | 26                    |
| <22 | Predicted ribosomal protein S7                                           | HP1196                        | 17959,6  | 6             | 135                       | 100              | 110             | 100    | 30                    |
| <23 | Predicted ribosomal protein L16                                          | HP1312                        | 16092,7  | 2             | 82                        | 99,999           | 75              | 100    | 17                    |
| <24 | Predicted ribosomal protein L15                                          | HP1301                        | 14896,2  | 6             | 227                       | 100              | 188             | 100    | 35                    |
| <25 | Predicted ribosomal protein S8                                           | HP1305                        | 15231,2  | 7             | 89                        | 100              | 33              | 99,618 | 42                    |
| <26 | Predicted ribosomal protein S9 involved in 30S ribosome subunit assembly | HP0083                        | 14499    | 2             | 80                        | 99,998           | 70              | 100    | 20                    |
| <27 | Predicted ribosomal protein S13                                          | HP1296                        | 13566,5  | 5             | 55                        | 99,477           | 22              | 95,826 | 40                    |

<sup>a</sup> Genome of strain 26695, annotation from the PyloriGene database <http://genolist.pasteur.fr/PyloriGene/>.

<sup>b</sup> The presented protein hits have a Mascot score  $\geq 45$ .

<sup>c</sup> The presented protein hits have a GPS Explorer protein confidence index  $\geq 95$  %.

<sup>d</sup> ND - not determined

**Table S5. Mass-spectrometry data for proteins co-purified with RhpA by TAP**

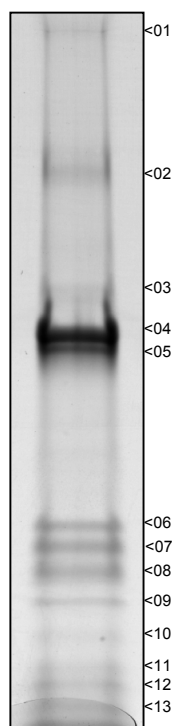

|         | Name                                                | Accession number <sup>a</sup> | MW      | Peptide count | Mascot Score <sup>b</sup> | CP% <sup>c</sup> | Total Ion Score | CP%    | Sequence coverage (%) |
|---------|-----------------------------------------------------|-------------------------------|---------|---------------|---------------------------|------------------|-----------------|--------|-----------------------|
| Band 01 | Predicted ATP-dependent RNA helicase                | HP0247                        | 55885,4 | 12            | 233                       | 100              | 180             | 100    | 22                    |
| Band 02 | Predicted ATP-dependent RNA helicase                | HP0247                        | 55885,4 | 13            | 265                       | 100              | 186             | 100    | 26                    |
| Band 03 | Predicted ATP-dependent RNA helicase                | HP0247                        | 55885,4 | 10            | 227                       | 100              | 185             | 100    | 19                    |
|         | RNaseJ                                              | HP1430 <sup>d</sup>           | 77509,1 | 6             | 165                       | 100              | 149             | 100    | 11                    |
| Band 04 | Predicted ATP-dependent RNA helicase                | HP0247                        | 55885,4 | 15            | 534                       | 100              | 435             | 100    | 34                    |
| Band 05 | Predicted ATP-dependent RNA helicase                | HP0247                        | 55885,4 | 15            | 373                       | 100              | 273             | 100    | 32                    |
| Band 06 | Predicted ribosomal protein L2/peptidyl-transferase | HP1316                        | 30309,1 | 10            | 244                       | 100              | 167             | 100    | 41                    |
| Band 07 | Predicted ribosomal protein L1                      | HP1201                        | 25250,5 | 6             | 186                       | 100              | 163             | 100    | 28                    |
|         | Predicted ribosomal protein S3                      | HP1313                        | 26420,6 | 6             | 109                       | 100              | 83              | 100    | 24                    |
| Band 08 | Predicted ribosomal protein S4                      | HP1294                        | 23949,8 | 13            | 447                       | 100              | 360             | 100    | 41                    |
|         | Predicted ribosomal protein L4                      | HP1318                        | 24122,5 | 3             | 139                       | 100              | 123             | 100    | 22                    |
| Band 09 | Predicted ribosomal protein L3                      | HP1319                        | 21292,2 | 7             | 227                       | 100              | 181             | 100    | 40                    |
| Band 10 | Predicted ribosomal protein L6                      | HP1304                        | 19474,5 | 5             | 175                       | 100              | 144             | 100    | 26                    |
| Band 11 | Predicted ribosomal protein S6                      | HP1246                        | 16960,7 | 6             | 117                       | 100              | 88              | 100    | 37                    |
|         | Predicted ribosomal protein S7                      | HP1196                        | 17959,6 | 5             | 88                        | 100              | 66              | 100    | 28                    |
|         | Predicted ribosomal protein L3                      | HP1319                        | 21292,2 | 5             | 66                        | 99,958           | 48              | 99,986 | 28                    |
|         | Predicted ribosomal protein S12                     | HP1197 <sup>d</sup>           | 15210,6 | 4             | 63                        | 99,917           | 33              | 99,531 | 14                    |
| Band 12 | Predicted ribosomal protein S7                      | HP1196                        | 17959,6 | 6             | 194                       | 100              | 167             | 100    | 32                    |
|         | Predicted ribosomal protein L22                     | HP1314 <sup>d</sup>           | 13125,3 | 3             | 91                        | 100              | 82              | 100    | 13                    |
|         | Predicted ribosomal protein S12                     | HP1197                        | 15210,6 | 3             | 64                        | 99,937           | 54              | 99,996 | 14                    |
| Band 13 | Predicted ribosomal protein L15                     | HP1301                        | 14896,2 | 5             | 272                       | 100              | 244             | 100    | 27                    |
|         | Predicted ribosomal protein L22                     | HP1314 <sup>d</sup>           | 13125,3 | 3             | 90                        | 100              | 81              | 100    | 13                    |

<sup>a</sup> Genome of strain 26695, annotation from the PyloriGene database <http://genolist.pasteur.fr/PyloriGene/>.

<sup>b</sup> The presented protein hits have a Mascot score  $\geq 45$ .

<sup>c</sup> The presented protein hits have a GPS Explorer protein confidence index  $\geq 95$  %.

<sup>d</sup> Proteins with percentage of coverage between 11 and 14, for which additional MS/MS analysis (shown below) were performed. MS/MS was performed as in Stingl *et al.* 2008. In each case, the protein identification was confirmed.

### Peptide View from Band 03

MS/MS Fragmentation of **VIMSTFSSNIHR**  
 Found in **HP1430**, (HP1430) 689 aa H. pylori 26695

Match to Query 58: 1406.699224 from(1407.706500,1+)  
 MalDIWellID: 498323, SpectrumID: 3119376,

**Monoisotopic mass of neutral peptide Mr(calc): 1406.70**

**Fixed modifications:** Carbamidomethyl (C)

**Variable modifications:**

**M3** : Oxidation (M)

**Ions Score:** 57 **Expect:** 4e-006

**Matches (Bold Red):** 22/178 fragment ions using 23 most intense peaks

| #  | Immon.        | a             | a*      | a <sup>0</sup> | b       | b*      | b <sup>0</sup> | Seq. | v             | w             | w'      | y             | y*            | y <sup>0</sup> | #  |
|----|---------------|---------------|---------|----------------|---------|---------|----------------|------|---------------|---------------|---------|---------------|---------------|----------------|----|
| 1  | 72.08         | 72.08         |         |                | 100.08  |         |                | V    |               |               |         |               |               |                | 12 |
| 2  | <b>86.10</b>  | <b>185.16</b> |         |                | 213.16  |         |                | I    | 1250.56       | 1263.58       | 1277.59 | 1308.64       | 1291.61       | 1290.63        | 11 |
| 3  | 120.05        | 332.20        |         |                | 360.20  |         |                | M    | 1103.52       | 1102.53       |         | 1195.55       | 1178.53       | 1177.54        | 10 |
| 4  | 60.04         | 419.23        |         | 401.22         | 447.23  |         | 429.22         | S    | 1016.49       | 1015.50       |         | 1048.52       | 1031.49       | 1030.51        | 9  |
| 5  | 74.06         | 520.28        |         | 502.27         | 548.27  |         | 530.26         | T    | <b>915.44</b> | 928.46        | 930.44  | <b>961.49</b> | 944.46        | 943.47         | 8  |
| 6  | 120.08        | 667.35        |         | 649.34         | 695.34  |         | 677.33         | F    | 768.37        |               |         | <b>860.44</b> | 843.41        | 842.43         | 7  |
| 7  | 60.04         | 754.38        |         | 736.37         | 782.38  |         | 764.36         | S    | <b>681.34</b> | <b>680.35</b> |         | 713.37        | 696.34        | 695.36         | 6  |
| 8  | 60.04         | 841.41        |         | 823.40         | 869.41  |         | 851.40         | S    | 594.31        | 593.32        |         | <b>626.34</b> | 609.31        | 608.33         | 5  |
| 9  | <b>87.06</b>  | 955.46        | 938.43  | 937.44         | 983.45  | 966.42  | 965.44         | N    | 480.27        | <b>479.27</b> |         | <b>539.30</b> | 522.28        |                | 4  |
| 10 | <b>86.10</b>  | 1068.54       | 1051.51 | 1050.53        | 1096.53 | 1079.51 | 1078.52        | I    | <b>367.18</b> | <b>380.20</b> | 394.22  | <b>425.26</b> | 408.24        |                | 3  |
| 11 | <b>110.07</b> | 1205.60       | 1188.57 | 1187.59        | 1233.59 | 1216.57 | 1215.58        | H    | <b>230.12</b> |               |         | <b>312.18</b> | <b>295.15</b> |                | 2  |
| 12 | 129.11        |               |         |                |         |         |                | R    | 74.02         | 73.03         |         | <b>175.12</b> | 158.09        |                | 1  |

### Peptide View from Band 11

MS/MS Fragmentation of **SPALVECPQRR**  
 Found in **HP1197**, (HP1197) 135 aa H. pylori 26695

Match to Query 53: 1311.677924 from(1312.685200,1+)  
 MalDIWellID: 498331, SpectrumID: 3119589,

**Monoisotopic mass of neutral peptide Mr(calc): 1311.67**

**Fixed modifications:** Carbamidomethyl (C)

**Ions Score:** 33 **Expect:** 0.0011

**Matches (Bold Red):** 19/157 fragment ions using 20 most intense peaks

| #  | Immon.       | a       | a*      | a <sup>0</sup> | b              | b*      | b <sup>0</sup> | d       | Seq. | v       | w             | y             | y*      | y <sup>0</sup> | #  |
|----|--------------|---------|---------|----------------|----------------|---------|----------------|---------|------|---------|---------------|---------------|---------|----------------|----|
| 1  | 60.04        | 60.04   |         | 42.03          | 88.04          |         | <b>70.03</b>   |         | S    |         |               |               |         |                | 11 |
| 2  | <b>70.07</b> | 157.10  |         | 139.09         | <b>185.09</b>  |         | 167.08         |         | P    | 1183.60 | 1182.60       | 1225.65       | 1208.62 | 1207.64        | 10 |
| 3  | 44.05        | 228.13  |         | 210.12         | <b>256.13</b>  |         | 238.12         |         | A    | 1112.56 |               | 1128.59       | 1111.57 | 1110.58        | 9  |
| 4  | <b>86.10</b> | 341.22  |         | 323.21         | <b>369.21</b>  |         | 351.20         |         | L    | 999.48  | 998.48        | 1057.56       | 1040.53 | 1039.55        | 8  |
| 5  | 72.08        | 440.29  |         | 422.28         | 468.28         |         | 450.27         |         | V    | 900.41  | 913.43        | 944.47        | 927.45  | 926.46         | 7  |
| 6  | 102.05       | 569.33  |         | 551.32         | 597.32         |         | 579.31         |         | E    | 771.37  | 770.37        | 845.40        | 828.38  | 827.39         | 6  |
| 7  | 133.04       | 729.36  |         | 711.35         | 757.35         |         | 739.34         |         | C    | 611.34  | <b>610.34</b> | <b>716.36</b> | 699.34  |                | 5  |
| 8  | <b>70.07</b> | 826.41  |         | 808.40         | 854.41         |         | 836.40         |         | P    | 514.28  | 513.29        | <b>556.33</b> | 539.30  |                | 4  |
| 9  | 101.07       | 954.47  | 937.44  | 936.46         | 982.47         | 965.44  | 964.46         |         | Q    | 386.23  | <b>385.23</b> | 459.28        | 442.25  |                | 3  |
| 10 | 129.11       | 1110.57 | 1093.55 | 1092.56        | <b>1138.57</b> | 1121.54 | 1120.56        | 1025.51 | R    | 230.12  | 229.13        | <b>331.22</b> | 314.19  |                | 2  |
| 11 | 129.11       |         |         |                |                |         |                |         | R    | 74.02   | 73.03         | <b>175.12</b> | 158.09  |                | 1  |

**Peptide View from Band 12**

MS/MS Fragmentation of **VDAGPVLR**  
 Found in **HP1314**, (HP1314) 122 aa H. pylori 26695

Match to Query 3: 825.470524 from(826.477800,1+)  
 MaldiWellID: 498332, SpectrumID: 3119619,

**Monoisotopic mass of neutral peptide Mr(calc): 825.47**  
**Fixed modifications:** Carbamidomethyl (C)  
**Ions Score:** 43 **Expect:** 7.3e-005  
**Matches (Bold Red):** 30/90 fragment ions using 32 most intense peaks

| # | Immon.       | a            | a <sup>0</sup> | b             | b <sup>0</sup> | Seq. | v             | w             | y             | y*            | y <sup>0</sup> | # |
|---|--------------|--------------|----------------|---------------|----------------|------|---------------|---------------|---------------|---------------|----------------|---|
| 1 | <b>72.08</b> | <b>72.08</b> |                | <b>100.08</b> |                | V    |               |               |               |               |                | 8 |
| 2 | 88.04        | 187.11       | <b>169.10</b>  | <b>215.10</b> | <b>197.09</b>  | D    | 667.39        | 666.39        | 727.41        | 710.38        | 709.40         | 7 |
| 3 | 44.05        | 258.14       | 240.13         | <b>286.14</b> | 268.13         | A    | 596.35        |               | <b>612.38</b> | 595.36        |                | 6 |
| 4 | 30.03        | 315.17       | 297.16         | <b>343.16</b> | 325.15         | G    |               |               | 541.35        | 524.32        |                | 5 |
| 5 | <b>70.07</b> | 412.22       | 394.21         | <b>440.21</b> | 422.20         | P    | 442.28        | 441.28        | <b>484.32</b> | <b>467.30</b> |                | 4 |
| 6 | <b>72.08</b> | 511.29       | 493.28         | 539.28        | 521.27         | V    | <b>343.21</b> | <b>356.23</b> | 387.27        | 370.24        |                | 3 |
| 7 | <b>86.10</b> | 624.37       | 606.36         | 652.37        | 634.36         | L    | <b>230.12</b> | <b>229.13</b> | <b>288.20</b> | <b>271.18</b> |                | 2 |
| 8 | 129.11       |              |                |               |                | R    | 74.02         | 73.03         | <b>175.12</b> | 158.09        |                | 1 |

**Peptide View from Band 12**

MS/MS Fragmentation of **VDAGPVLRR**  
 Found in **HP1314**, (HP1314) 122 aa H. pylori 26695

Match to Query 29: 981.575124 from(982.582400,1+)  
 MaldiWellID: 498332, SpectrumID: 3119612,

**Monoisotopic mass of neutral peptide Mr(calc): 981.57**  
**Fixed modifications:** Carbamidomethyl (C)  
**Ions Score:** 38 **Expect:** 0.00019  
**Matches (Bold Red):** 34/113 fragment ions using 41 most intense peaks

| # | Immon.        | a             | a*     | a <sup>0</sup> | b             | b*            | b <sup>0</sup> | d      | Seq. | v             | w             | y             | y*            | y <sup>0</sup> | # |
|---|---------------|---------------|--------|----------------|---------------|---------------|----------------|--------|------|---------------|---------------|---------------|---------------|----------------|---|
| 1 | <b>72.08</b>  | <b>72.08</b>  |        |                | <b>100.08</b> |               |                |        | V    |               |               |               |               |                | 9 |
| 2 | 88.04         | <b>187.11</b> |        | <b>169.10</b>  | <b>215.10</b> |               | 197.09         |        | D    | 823.49        | 822.49        | 883.51        | 866.48        | 865.50         | 8 |
| 3 | 44.05         | 258.14        |        | 240.13         | <b>286.14</b> |               | 268.13         |        | A    | 752.45        |               | <b>768.48</b> | <b>751.46</b> |                | 7 |
| 4 | 30.03         | 315.17        |        |                | <b>297.16</b> | <b>343.16</b> |                |        | G    |               |               | 697.45        | 680.42        |                | 6 |
| 5 | <b>70.07</b>  | 412.22        |        | 394.21         | <b>440.21</b> |               | 422.20         |        | P    | 598.38        | 597.38        | 640.43        | 623.40        |                | 5 |
| 6 | <b>72.08</b>  | 511.29        |        | 493.28         | 539.28        |               | 521.27         |        | V    | <b>499.31</b> | 512.33        | 543.37        | 526.35        |                | 4 |
| 7 | <b>86.10</b>  | 624.37        |        | 606.36         | 652.37        |               | 634.36         |        | L    | 386.23        | <b>385.23</b> | 444.30        | 427.28        |                | 3 |
| 8 | <b>129.11</b> | 780.47        | 763.45 | 762.46         | <b>808.47</b> | 791.44        | 790.46         | 695.41 | R    | 230.12        | <b>229.13</b> | 331.22        | 314.19        |                | 2 |
| 9 | <b>129.11</b> |               |        |                |               |               |                |        | R    | 74.02         | 73.03         | <b>175.12</b> | 158.09        |                | 1 |

**Peptide View from Band 13**

MS/MS Fragmentation of **VDAGPVLR**  
 Found in **HP1314**, (HP1314) 122 aa H. pylori 26695

Match to Query 3: 825.468024 from(826.475300,1+)  
 MaldiWellID: 498333, SpectrumID: 3119642,

**Monoisotopic mass of neutral peptide Mr(calc): 825.47**

**Fixed modifications:** Carbamidomethyl (C)

**Ions Score:** 56 **Expect:** 4.1e-006

**Matches (Bold Red):** 33/90 fragment ions using 32 most intense peaks

| # | Immon.       | a             | a <sup>0</sup> | b             | b <sup>0</sup> | Seq.     | v             | w             | y             | y*            | y <sup>0</sup> | #        |
|---|--------------|---------------|----------------|---------------|----------------|----------|---------------|---------------|---------------|---------------|----------------|----------|
| 1 | <b>72.08</b> | <b>72.08</b>  |                | <b>100.08</b> |                | <b>V</b> |               |               |               |               |                | <b>8</b> |
| 2 | 88.04        | <b>187.11</b> | <b>169.10</b>  | <b>215.10</b> | 197.09         | <b>D</b> | 667.39        | 666.39        | <b>727.41</b> | <b>710.38</b> | 709.40         | <b>7</b> |
| 3 | 44.05        | 258.14        | 240.13         | <b>286.14</b> | 268.13         | <b>A</b> | 596.35        |               | <b>612.38</b> | 595.36        |                | <b>6</b> |
| 4 | 30.03        | 315.17        | 297.16         | <b>343.16</b> | 325.15         | <b>G</b> |               |               | <b>541.35</b> | <b>524.32</b> |                | <b>5</b> |
| 5 | <b>70.07</b> | 412.22        | 394.21         | <b>440.21</b> | 422.20         | <b>P</b> | 442.28        | <b>441.28</b> | 484.32        | <b>467.30</b> |                | <b>4</b> |
| 6 | <b>72.08</b> | <b>511.29</b> | 493.28         | <b>539.28</b> | 521.27         | <b>V</b> | <b>343.21</b> | <b>356.23</b> | 387.27        | 370.24        |                | <b>3</b> |
| 7 | <b>86.10</b> | 624.37        | 606.36         | 652.37        | 634.36         | <b>L</b> | 230.12        | <b>229.13</b> | <b>288.20</b> | <b>271.18</b> |                | <b>2</b> |
| 8 | 129.11       |               |                |               |                | <b>R</b> | 74.02         | 73.03         | <b>175.12</b> | 158.09        |                | <b>1</b> |

**Table S6. Mass-spectrometry data for Hp-RNase J and RhpA co-purified from *E. coli***

Gel A1 (Fig. 4)

|                      | Name                            | Accession number | MW      | Peptide count | Protein score | CI% | Total Ion Score | CI% | Sequence coverage (%) |
|----------------------|---------------------------------|------------------|---------|---------------|---------------|-----|-----------------|-----|-----------------------|
| Band 01 <sup>#</sup> | (HP0247) 492 aa H. pylori 26695 | HP0247           | 55885,4 | 18            | 579           | 100 | 431             | 100 | 40                    |
| Band 02              | (HP1430) 689 aa H. pylori 26695 | HP1430           | 77509,1 | 17            | 680           | 100 | 578             | 100 | 33                    |

Gel A2 (Fig. 4)

|         | Name                                                                               | Accession number | MW      | Peptide count | Protein score | CI% | Total Ion Score | CI% | Sequence coverage (%) |
|---------|------------------------------------------------------------------------------------|------------------|---------|---------------|---------------|-----|-----------------|-----|-----------------------|
| Band 01 | (HP0247) 492 aa H. pylori 26695                                                    | HP0247           | 55885,4 | 14            | 447           | 100 | 353             | 100 | 30                    |
| Band 02 | gi 67462334 sp P0A6Y8 DNAK_ECOLI Chaperone protein dnaK (Heat shock protein 70)    | gi 000154        | 69129,5 | 12            | 180           | 100 | 129             | 100 | 24                    |
| Band 03 | (HP1430) 689 aa H. pylori 26695                                                    | HP1430           | 77509,1 | 14            | 480           | 100 | 407             | 100 | 27                    |
| Band 04 | gi 62288014 sp P0A6F5 CH60_ECOLI 60 kDa chaperonin (Protein Cpn60) (groEL protein) | gi 000155        | 57463,8 | 18            | 253           | 100 | 155             | 100 | 34                    |

# - Numbers correspond to the bands marked with triangles and asterisks in Fig. 4A-1 and 4A-2 from the top to the bottom.

## References

28. Backert S, Kwok T, Konig W (2005) Conjugative plasmid DNA transfer in *Helicobacter pylori* mediated by chromosomally encoded relaxase and TraG-like proteins. *Microbiology* **151**(11): 3493-3503
27. Boneca IG, Ecobichon C, Chaput C, Mathieu A, Guadagnini S, Prevost MC, Colland F, Labigne A, de Reuse H (2008) Development of inducible systems to engineer conditional mutants of essential genes of *Helicobacter pylori*. *Appl Environ Microbiol* **74**(7): 2095-2102
57. Muller C, Bahlawane C, Aubert S, Delay CM, Schauer K, Michaud-Soret I, De Reuse H (2011) Hierarchical regulation of the NikR-mediated nickel response in *Helicobacter pylori*. *Nucleic Acids Res* **39**(17): 7564-7575
25. Stingl K, Schauer K, Ecobichon C, Labigne A, Lenormand P, Rousselle JC, Namane A, de Reuse H (2008) In vivo interactome of *Helicobacter pylori* urease revealed by tandem affinity purification. *Mol Cell Proteomics* **7**(12): 2429-2441

HpyB8 MTDNNHYENNESNENSSENSKVDARAGAFERFTNRKKRFRENAQKNAGESHHEAPSHHK  
Hpy26695 MTDNN--QNNENHENSSENSKADEMRAAGAFERFTNRKKRFRENAQKNAEYSNHEASSHHK  
J1\_Bsu -----  
J2\_Bsu -----  
Tth -----

HpyB8 KEHRPNKKPNHHKQKHAKTRNYAKEELDSNKVEGVTEILHVNERGTLGPHKELKKGVE  
Hpy26695 KEHRPNKKPNHHKQKHAKTRNYAQEELDSNKVEGVTEILHVNERGTLGPHKELKKGVEA  
J1\_Bsu -----  
J2\_Bsu -----  
Tth -----

HpyB8 NNKIQVEHLNPHYKMLNSKASVKITPLGGLGEIGGNMMVIETPKSAIVHAGMSFPKEG  
Hpy26695 NNKIQVEHLNPHYKMLNSKASVKITPLGGLGEIGGNMMVIETPKSAIVHAGMSFPKEG  
J1\_Bsu -----MKFVK-NDQAVFALGGLGEIGKNTYAVQFQDEIVLHAGIKFPEDE  
J2\_Bsu -----MKKKN-TENVRIIALGGVGEIGKNLYVIEIDSDIFVVHAGLMHPENE  
Tth -----MSQGGPQDHVEIIPLGGMGEIGKNITVFRFRDEIFVHAGGLAFPEEG  
: : .\*\*\*:\*\*\* \* . . . . :\*: \* : \* : :

HpyB8 LFGVDILIPDFSYLHQIKDKIAGIIITHAHEDHIGATPYLKFELQ----FPLYGTPLSL  
Hpy26695 LFGVDILIPDFSYLHQIKDKIAGIIITHAHEDHIGATPYLKFELQ----FPLYGTPLSL  
J1\_Bsu LLGIDYVIPDYTYLVKNEDKIKGLFITHAHEDHIGGIPYLLRQVN----IPVYGGKLAI  
J2\_Bsu MGLGDVVPDISYLIERADRVAIFLTHCHDENIGGVFYLLNKLSD----VPVYGTKLTL  
Tth MPGVDLIPRVLYLIEHRHKIKAWLTHCHEDHIGGLPFLPMIFGKESVPYIYARLTL  
: \* : \* \* \* \* \* : : : . . . . :\*: \* : \* : \*

HpyB8 GLIGSKFDEHGLKKYRSYFKIVEKRCPI SV-GEFIEWIHITHSIIIDSSALAIQTKAGTI  
Hpy26695 GLIGSKFDEHGLKKYRSYFKIVEKRCPI SV-GEFIEWIHITHSIIIDSSALAIQTKAGTI  
J1\_Bsu GLLRNKLEEHGLLR-QTKLNIIGEDDVKF-RKTAVSFFRTHSIPDSYGIIVVTPPGNI  
J2\_Bsu ALLREKLQYGNR-KTDLREIHSKSVITF-ESTKVSFFRTHSIPDSYGVSPKTSLSGI  
Tth GLLRGKLEEFGRPGAFNLKEISPDRIQVGRYFTLDFRMTHSIPDNSGVVIRTPIGTI  
. \* : \* : . . . . : : : . . . . : \* \* \* \* . : : \* \* \*

HpyB8 IHTGDFKIDHTPVDNLPDLYRLAHYGEKGMVLLSDSTNSHKSCTPSESTIAPAFDTL  
Hpy26695 IHTGDFKIDHTPVDNLPDLYRLAHYGEKGMVLLSDSTNSHKSCTPSESTIAPAFDTL  
J1\_Bsu VHTGDFKDFTPVG-EPANLTKMAEIGKEGLCCLSDSTNSENPEFTMSERRVGSIHDI  
J2\_Bsu VCTGDFKDFTPALNQTCDIGETAKIGNSGVLALLSDSANAERPYPSEAAVSGESDSA  
Tth VHTGDFKIDHTPVDNLPDLYRLAHYGEKGMVLLSDSTNSHKSCTPSESTIAPAFDTL  
: \* \* \* \* \* \* \* : : : . . . . : \* \* \* \* \* : \* \* \* \* \* : \* \* \* \* \*

HpyB8 FKEAQGRVIMSTFSSNIHRVYQAIQYGIKYNRKAIAVIGRSMKLNLDIARELGVIHLPYQS  
Hpy26695 FKEAQGRVIMSTFSSNIHRVYQAIQYGIKYNRKAIAVIGRSMKLNLDIARELGVIHLPYQS  
J1\_Bsu FRKVDGRIIFATFASNIHRLQVIEAAVQGRKVAVFGGRSMESAIEIGQTLGYNCPKNT  
J2\_Bsu LYNSQNRVIAVAFASNINRIQQVIAHAAQNGRKAIAVAGKLNQSVLQLARKLGYIADDEL  
Tth IGRAPGRVFTTFASHIHRIQSVIAAEKYGRKVAMEGRSMLKFSRIARELGLYKVDRL  
: . . . . : \* \* \* \* \* : . . . . : \* \* \* \* \* : \* \* \* \* \* : . . . .

HpyB8 FIEANEVAKYPDNEVLIVTGSQGETMSALYRMATDEHRHISIKPNDLVIISAKAIPGNE  
Hpy26695 FIEANEVAKYPDNEVLIVTGSQGETMSALYRMATDEHRHISIKPNDLVIISAKAIPGNE  
J1\_Bsu FIEHNEINRMPANKVITLCTGSQGEPMALSRANGTHRQISINPGDVTVVSSSPIPGNT  
J2\_Bsu FISVDVKYKREVAIITAGSQGEPLAALTRMANKAHKQLNIEEGDTVVIASIPGQE  
Tth YT-LEEVKDLDPHQVLLATGSQGPMSVLHRLAFEGHAKMAIKPGDVTVILSSSPIPGNE  
: : : \* : : \* : \* \* \* \* : : : \* : : \* : \* : \* : \* : \* : \* : \* : \* : \* : \* : \*

HpyB8 ASVSAVNLFLIKKEAKVAYQEPDNIHVSCHAAQEEQKLMRLIKPKFPLPVHGEYNHVAR  
Hpy26695 ASVSAVNLFLIKKEAKVAYQEPDNIHVSCHAAQEEQKLMRLIKPKFPLPVHGEYNHVAR  
J1\_Bsu ISVSRITNQLYRAGAIEVHGPLNDIHTSCHGGQEEQKLMRLIKPKFMPPIHGEYRMOQM  
J2\_Bsu LIYSKTVDLLARAGAQVIFAQR-VHVSCHGGQEEQKLMRLIKPKYLIIPVHGEYRMOQA  
Tth EAVNRVINRLYALGAYVLYPPTYKVEASCHASQEEQKLMRLIKPKYLIIPVHGEYRMOQM  
: : : \* \* \* : \* \* \* \* \* \* \* \* \* \* \* \* \* \* \* \* \* \* \* \* \* \* \* \*

HpyB8 HKQTAISCGVPEKNIYLMEDGDQVEVGPAFIKKGVTIKSGKSYVDNQSNLSIDTSIVQQR  
Hpy26695 HKQTAISCGVPEKNIYLMEDGDQVEVGPAFIKKGVTIKSGKSYVDNQSNLSIDTSIVQQR  
J1\_Bsu HVKLATDCGIPEENCFIMDNGEVLALKGDEASVAGKIPSGSVYIDGSGIGDIGNIVLRDR  
J2\_Bsu HSKIAEETMKRSDIFLIEKGDVVEFRGQNVKIGDKVPYGNILIDGLGVGDIGNIVLRDR  
Tth FKWLAE SMSRPEKTLIGENGAVYRLTRETTEKVGVEVPHGVLYVDGLGVGDITEEILADR  
: \* . . . . : : \* . . . . : \* . . . . : \* . . . . : \* . . . .

HpyB8 EEVASAGVFAATIFVNKNKQALLESSQFSSLGLVGFKDEKHLIKEIQGGLEMLLKSSNAE  
Hpy26695 EEVASAGVFAATIFVNKNKQALLESSQFSSLGLVGFKDEKHLIKEIQGGLEMLLKSSNAE  
J1\_Bsu RILSEGLVIVVVSIDMDDFKISAGPDLISRGFVYMRSEGLINDAQELISNHLQKVMER  
J2\_Bsu RLLSQDGLIVITLQKQKHLVSGPEIITRGFVYVRESEGLIVQATELVRSIVTEATET  
Tth RHMAEEGLVITALAGED----PVVEVVSARGFVKAGER--LLGEVRRMALEALKNGVRE  
: : : \* : . . . . : : : \* : \* : \* : \* : \* : \* : \* : \* : \* : \* : \*

HpyB8 ILNPKKLEDHTRNFIRKALFKFRKYPALICHAHSF  
Hpy26695 ILNPKKLEDHTRNFIRKALFKFRKYPALICHAHSF  
J1\_Bsu KTTQWSEIKNEITDTLAPFLYEKTKRRPMILPIIMEV  
J2\_Bsu SNVEWSTLQAMRDALNQFLYEKTKRRPMILPIIMEV  
Tth K-KPLERIRDDIYYPVKFKKATGRDPMILPVIEG  
: . . . : : \* : : \* \* : .



**Figure S1. Alignment of RNase J from *H. pylori* B128 and 26695 strains with RNase J1 and J2 from *Bacillus subtilis* and RNase J from *Thermus thermophilus*.**

J1\_Bsu - RNase J1; J2\_Bsu - RNase J2 of *B. subtilis*; Tth - RNase J of *T. thermophilus*. Amino-acids constituting the active site are highlighted with black boxes (Zn<sup>2+</sup> coordination) and empty boxes (phosphate coordination). The *H. pylori*-specific N-terminal extension of RNase J is underlined.

```

Rhp MELNQPLPTEIDGDAYHKPSFNDLGLK-ESVLKSVYEAGFTSPSPIQEKAI PAVLQGRD 59
SrmB -----MTVTFSELELD-ESLLEALQDKGTRPTAIQAAAI PPAALDGRD 43
Rh1E -----MSPFDSLGLS-PDILRAVAEQGYREPTPIQQQAI PAVLEGRD 40
Rh1B -----MSKTHLTEQKFSDFALH-PKVVEALEKKGPHNCTPIQALALPLTLAAGR 48
CshA_Bsu MVNHDITETAIRRSLNLTITFDNFSL-SDLMKA INRMGFEEATP IQAQTIP LGLSKND 59
DeaD -----MAEFETTFADLGLK-APILEALNDLGYEKPSP IQAECIPHLNLRD 45
DbpA -----MTAFSTLNLVPPAQLTNLNLGVLTMTPVQAAAL PAILAGKD 42
      | * : : : * : : * * : *
      |a
Rhp VIAQQTGTGKTAAFALPI INNLKNNHTIEA-----LVITPTRELAMQISDEIFKLG 111
SrmB VLGSAPTGTGKTAAYLLPALQHLDFPRKKS GPP---RILLTPTRELAMQVSDHARELA 100
Rh1E LMASAQTGTGKTAGFTLPLLOHLITRQPHAKGRR-PVRALILTPTRELAAQIGENVRDYS 99
Rh1B VAGQAQTGTGKTMAFLTSTFHYLLSHPA IADRKVNPRALIMAPTR ELAVQHADAEP LA 108
CshA_Bsu VIGQAQTGTGKTAAFGIPLVEKINPESPNIQ-----AIV IAPTRELA IQVSEELYKIG 112
DeaD VLGMAQTGSGKTAAFSLPLLQNLDP ELKAPQ-----ILV LAPTRELA VQVAEAMTDFS 98
DbpA VRVQAKTGSKGTAAFG LGLLQIDASLFQ TQ-----ALV LCPTR ELA DQVAGELRRLA 95
      : * * : * * : : : * * : * * : *
      : * * : * * : : : * * : * * : *
      |b |
Rhp KHTR-TKTVCVYGGQSVKQCEFIKKNPQVMIATPGRLLDHLKNERIHKFV PKVVVLDES 170
SrmB KHTH-LDIATITGGVAYMNHAEVFS ENQDIVVATTGRLLQY IKEENFDCRAVETLILDEA 159
Rh1E KYLN-IRSLVVFVGGVSNPMMKLRGGVDV LVATPGRLLDLEHQNAVKLQDVEI LVLDEA 158
Rh1B EATG-LKGLGAYGGDYDKQLKLVESGV DILIGTGRLLIDYAKQNHNLGAIQVVLDEA 167
CshA_Bsu QDKR-AKVLPIYGGQDIGRQIRALKKNPNI IVGTPGRLLDHLNRRTRIRLNNVTVMVDEA 171
DeaD KHRMGVNVVALYGGQRYDQVLRALRQGP I VVGTPGRLLDHLKRGTLDDL SKLSGLVDEA 158
DbpA RFLPNTKILTLGGQPFMQRDSLQHAPHI IVATPGRLLDHLQKGTVSLDALNTLVMDEA 155
      . ** : : : * * : * * : *
      |iii
Rhp DEMLDMGFLDDIEEIPDYL P--SEAQILLFSATMP-EPIKRLADKILENPIKIHIAPSNI 227
SrmB DRMLDMGFAQDIEHIAGETR--WRKQTL LFSATLEGDAIQDFAERLLEDVPEVVSANPSTR 217
Rh1E DRMLDMGFIHDIRRVLTKLP--AKRQNL LFSATFS-DDIKALAEKLLHNPLEIEVARNT 215
Rh1B DRMYDLGFIKDIRWLFRRMPANQRNLN LFSATLS-YRVRELA FEQMNAEYIEVEPEQK 226
CshA_Bsu DEMLNMGFIDDI ESILSNVP--SEHQTL LFSATMP-APIKRIAEFRMTEPEHVVKVAKEM 228
DeaD DEMLRMGFI EDVETIMAQIP--EGHQ TALSATMP-EAIRRITRRFMKEPQEVRIQSSVT 215
DbpA DRMLDMGFSDAIDDVIRFAP--ASRQ TLLFSATWP-EATAAISGRVQRDLAIEIDSDTA 212
      * . * * : : : * * : * * : *
      |iv
Rhp TNDTITQRFYVINEHERAEAIMR-LLD TQAPKKSIVFTRTKKEADELHQFLASKNYKSTA 286
SrmB ERKKIHQWYRADDLEHK TALLVHLLKQPEATR SIVFVRKREHVHELANWLREAGINNCY 277
Rh1E ASDQVTQHVHFV-DKKRKRRELLSHMI GKGNWQVLFVTRTKHGANHLAEQLNKDGRSAA 274
Rh1B TGHRIKEELFY P-SNEEKMRLLQTLIEE EWPDRAI IFANTKHRCEBIEWGLHADGHRVGL 285
CshA_Bsu TVSNIQQFYLEVQERKK-FDTLTRL LDIQSP ELAIVFGRTKRRVDELAEALNLRGYAEG 287
DeaD TRFDISQSWYVWGMKNEALVR-FLEA EDFDAAI FVTRTKNATLEVAEALERNGYNSAA 274
DbpA LPP--IEQQFYETSSKGIPLQLRLLS LHPSSCVVFCNTKKKDCQAVCDALNEVGGQSALS 270
      : * * : * * : : : * * : * * : *
      : * * : * * : : : * * : * * : *
      |v |
Rhp LHGDMQDRDRSSIMAFKKNADVLVATDVASRGLDISGVSHVFNHPLNLTESYIHRIG 346
SrmB LEGEMVQGRNEAIKRLTEGRVNVLVATDVAARG IDIPDVSHVFNDFMPSRSGDYLHRIG 337
Rh1E IHGNSQGARTRALADFKSGDIRVLVATDIAARGLDIEELPHVNVNYPVPEVYVHRIG 334
Rh1B LTGDVAQKRLRILDEFTRGDLILVATDVAARGLHIPAVTHVFNVDLPDDCEDYVHRIG 345
CshA_Bsu IHGDLTQAKRMVALRKFKEGAEVLVATDVAARGLDISGVTHVFNVDVPQDPESVYVHRIG 347
DeaD LNDMNOALREQTLERLKDGRDLIL IATDVAARGLDVERISLVVNYDIPMDESIVYHRIG 334
DbpA LHGDLEQRDRDQTLVRFANGSARVLVATDVAARGLDIKSLVNVNFEALWDEPVYVHRIG 330
      : * * : * * : : : * * : * * : *
      : * * : * * : : : * * : * * : *
      |vi
Rhp RTGRAGKKGMAITLVTPLEYKELLRMQEIDSEIELFEIPTINEN----QI IKTLHDAK 401
SrmB RTARAGRKGTAI SLVEAHDHLLGKVGRYIEEPIKARVIDELRP-----KTRAPSE 388
Rh1E RTGAAAATGEALSLVCVDEHLLRDI EKLLKKEIPRAIIPGYEP----- 378
Rh1B RTGRAGASGHSISLACEEYALNLP AIEYI GHSIP---VSKYNP----- 386
CshA_Bsu RTGRAGKTGMAMFITPREKSMRLRAIEQTTRKMRDMKPEPTLDEA----LEGGQVTV 402
DeaD RTGRAGRAGRALLFVENRERLLRN IERTMKLTIPEVELPNAELLGKRRLKFAAKVQQ 394
DbpA RTARAGNSGLAISFCAP EEAQRANII SDMLQIKLNWQTPPANSIAT----- 377
      * . * * : : : * * : * * : *
      : * * : * * : : : * * : * * : *
      |vii
Rhp VSEGIISLYEQLTEIFEPSQLV LKLLSQFETSKIGLNQOEIDA IQNPKKPKPSNKKT 461
SrmB KQTG-----KPS---KVLAKRAEK-----KKAKEKE-KPRVKKR 419
Rh1E -----DPSIKAEP IONGRQQRGGGGRGQGGGGRGQQQPRGEGGAKSASA 422
Rh1B -----DALMTDLPKP-LRLTR-----PRTGNG----- 407
CshA_Bsu RLRTTISENNLNFYMTAAAE LLEDHDAVTVVA AAIKMATKEPDDTPVRLTDEAPMVSKRY 462
DeaD LESSDLQYRALLSKIQPTAEGEELDLET LAAALLKMAQGERTLIVPPDAPMRPKREFRD 454
DbpA -----LEAEMATLCIDGGKAKMRPGDVLGAL TGDIGLDGADIGKIAVHP 422
      .
Rhp PQHERARSFKKQHRDRHPKTNHYSKPKRR----- 492
SrmB --HRDTKNIGKR---RKPSGTGVPPQ TTEE----- 444
Rh1E KPAEKPSRRLGDAKPAGEQORRRRPRKPAA AQ----- 454
Rh1B ---PRR---TGAPNRRRRSG----- 421
CshA_Bsu KNQRSSKRRDQGGGGRYGGGKSNRRSSYDKKRSNDRSSGDRRQKKS Y----- 511
DeaD RDDRGRDRNDRGPRGDREDRPRRER RDVGMQLYRIE VGRDDGVVVRHIVGAIANEGDI 514
DbpA AHVYVAVRQAVAHKAWQLQGGKIKGKTCRVRLK----- 457
      .
Rhp -----
SrmB -----
Rh1E -----
Rh1B -----
CshA_Bsu -----
DeaD SSRYIGNIKLFASHSTIELPKMPGEVLQH FTRTRILNKPMNQLLGDAQPHTGGERRGG 574
DbpA -----
      .
Rhp -----
SrmB -----
Rh1E -----
Rh1B -----
CshA_Bsu -----
DeaD GRGFGGERREGGRNFSGERREGGRGDGR RFSGERREGRAPRRDSTGRRRFGGDA 629
DbpA -----

```

**Figure S2. Alignment of RhpA, the DExD box RNA helicase of *H. pylori* with its orthologues of *E. coli* and *B. subtilis*.**

Conserved RNA and ATP binding motifs are numbered from I to VI and highlighted with grey boxes.

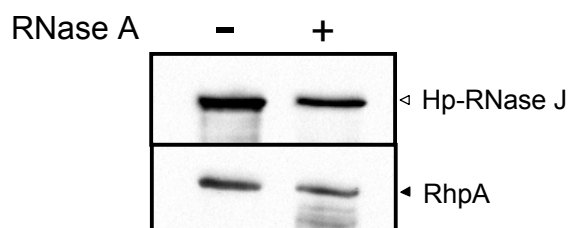

**Figure S3. Co-purification of Hp-RNase J and RhpA after RNase A treatment of cell lysates.**

His<sub>6</sub>-Hp-RNase J and GST-RhpA were co-expressed in *E. coli* as described in Materials and Methods. RNase A (Roche) was added to the cell suspension to final concentration 5 µg/ml before lysis with French Press. The complex was purified as described, on glutathione column (GSTrap™ FF, GE Healthcare) and pooled purified fractions analysed by Western blotting using Hp-RNase J or GST-specific antibodies.

Upper panel - Western blot showing Hp-RNase J in the pooled fractions of purified complex; lower panel - Western blot showing RhpA in the same fractions.
